# Supplementary material
Source: PubMed Central journal article supplement (PMC7202131)
Supplement: NIHMS1545077-supplement-1.pdf [file NIHMS1545077-supplement-1.pdf]

Supplemental file contents:

**Supplemental Table 1:** ICD-9 and ICD-10 codes definitions for comorbidities and outcomes.

**Supplemental Table 2:** Rates per 100 person-years for long-term outcomes by type of ACS presentation

**Supplemental Table 3:** Balance after propensity score matching between invasive and conservative approach groups in patients presenting with non-ST elevation acute coronary syndrome.

**Supplemental Figure 1:** Flow chart of the study population.

**Supplemental Figure 2:** Distribution of types of myocardial infarction by timing of presentation

**Supplemental Figure 3:** Unadjusted Kaplan Meier curves of A) survival, B) heart failure, C) bleeding, D) need for revascularization, and E) acute coronary syndrome readmission, with invasive versus conservative approach in patients presenting with non-ST elevation acute coronary syndrome after TAVR

**Supplementary table 1: ICD codes for comorbidities and outcomes**

|                         | ICD-9 code                                                                                                                                                               | ICD-10 code                                                                                                                                                                                                                                                                                              |
|-------------------------|--------------------------------------------------------------------------------------------------------------------------------------------------------------------------|----------------------------------------------------------------------------------------------------------------------------------------------------------------------------------------------------------------------------------------------------------------------------------------------------------|
| Chronic kidney disease  | 5853, 5854                                                                                                                                                               | N183, N184                                                                                                                                                                                                                                                                                               |
| End-stage renal disease | 5855, 5856, V4511                                                                                                                                                        | N185, N186, Z992                                                                                                                                                                                                                                                                                         |
| Acute Kidney injury     | 5845, 5846, 5847,<br>584, 5848, 5849                                                                                                                                     | N17, N170, N171, N172, N178, N179,<br>N990                                                                                                                                                                                                                                                               |
| Atrial fibrillation     | 42731                                                                                                                                                                    | I480*, I481*, I482*, I489*                                                                                                                                                                                                                                                                               |
| Underweight             | 78322                                                                                                                                                                    | V850, Z681, R636                                                                                                                                                                                                                                                                                         |
| Obesity                 | 2780, 27800, 7802,<br>27803, 27801                                                                                                                                       | E668, E669, E661, E6609<br>E663, E669, V853, V853, V8531,<br>V8532, V8533, V8534, V8535, V8536,<br>V8537, V8538, V8539, Z683, Z6831,<br>Z683, Z6833, Z6834, Z6835, Z6836,<br>Z6837, Z6838, Z6839, E662, E6601,<br>V854, V8541, V8542, V8543, V8544,<br>V8545, Z684, Z6841, Z6842, Z6843,<br>Z6844, Z6845 |
| Cardiogenic shock       | 78551, 78550                                                                                                                                                             | R570                                                                                                                                                                                                                                                                                                     |
| Cardiac arrest          | 4274, 4275, 42741,<br>42742                                                                                                                                              | I462, I46, I468, I469, I4901, I49,<br>I4902, I9712, I97120, I97121                                                                                                                                                                                                                                       |
| Blood transfusion       | 9901, 9902, 9903,<br>9904, 9905, 9906,<br>9907, 9908, 9909                                                                                                               | 30243N0, 30243N1, 30243P0,<br>30243P1,<br>30243H0, 30243H1, 30240N0,<br>30240N1, 30240P0, 30240P1,<br>30240H0, 30240H1, 30230H0,<br>30230H1, 30230N0,<br>30230N1, 30230P0, 30230P1,<br>30233N0, 30233N1, 30233P0,<br>30233P1                                                                             |
| Sleep apnea             | 78057, 32723                                                                                                                                                             | G4730, G4733                                                                                                                                                                                                                                                                                             |
| Heart failure           | 39891, 40201, 40211,<br>40291, 40401, 40411,<br>40491, 4280-4289                                                                                                         | I5020, I5021, I5022, I5023, I5030,<br>I5031, I5032, I5033, I5040, I5041,<br>I5042, I5043                                                                                                                                                                                                                 |
| Bleeding                | 4552, 4555, 4558,<br>4560, 45620, 5307,<br>53082, 5310-5316,<br>5320-5326, 5330-<br>5336, 5340-5346,<br>53501-53561, 56202-<br>56203, 56212-56213,<br>5693, 56985, 5780, | R310*, R311*, R312*, R319*,<br>M25019,<br>R040*, R041*, R042*, R0481, R0489,<br>R049,<br>I312*, R58*<br>S064X0A, S064X1A, S064X2A,<br>S064X3A, S064X4A, S064X5A,<br>S064X6A, S064X7A, S064X8A,                                                                                                           |

|                                                |                                                                                                                                         |                                                                                                                                                                                                                                                                                                                                                                                                                                                                                                                                                                                                                                                               |
|------------------------------------------------|-----------------------------------------------------------------------------------------------------------------------------------------|---------------------------------------------------------------------------------------------------------------------------------------------------------------------------------------------------------------------------------------------------------------------------------------------------------------------------------------------------------------------------------------------------------------------------------------------------------------------------------------------------------------------------------------------------------------------------------------------------------------------------------------------------------------|
|                                                | 5781, 5789,<br>53783, 56881, 430*,<br>431*, 432*, 59970,<br>59971, 59972, 71911,<br>7847*, 7848x, 7863*,<br>4230*, 4590*,<br>852*, 853* | S064X9A, S065X0A, S065X1A,<br>S065X2A, S065X3A, S065X4A,<br>S065X5A, S065X6A, S065X7A,<br>S065X8A, S065X9A, S066X0A,<br>S066X1A, S066X2A, S066X3A,<br>S066X4A, S066X5A, S066X6A,<br>S066X7A, S066X8A, S066X9A.                                                                                                                                                                                                                                                                                                                                                                                                                                                |
| Ischemic stroke                                | 433*, 434*, 436*,<br>4371, 4378, 4379                                                                                                   | I63, I65, I66, I6781, I6782, I6789, I679                                                                                                                                                                                                                                                                                                                                                                                                                                                                                                                                                                                                                      |
| Anterior ST-elevation<br>myocardial infarction | 4100, 41000, 41001,<br>4101, 41010, 41011                                                                                               | I210, I2101, I2102, I2109                                                                                                                                                                                                                                                                                                                                                                                                                                                                                                                                                                                                                                     |
| Inferior ST-elevation<br>myocardial infarction | 4102, 41020, 41021,<br>4103, 41030, 41031,<br>4104, 41040, 41041,<br>4105, 41050, 41051,<br>4106, 41060, 41061                          | I211, I2111, I2119, I2121, I212, I2129,<br>I213,                                                                                                                                                                                                                                                                                                                                                                                                                                                                                                                                                                                                              |
| Non ST-elevation<br>myocardial infarction      | 4107, 41070, 41071                                                                                                                      | I214                                                                                                                                                                                                                                                                                                                                                                                                                                                                                                                                                                                                                                                          |
| Unstable angina                                | 4111                                                                                                                                    | I200                                                                                                                                                                                                                                                                                                                                                                                                                                                                                                                                                                                                                                                          |
| Drug eluting stent                             | 3607                                                                                                                                    | 0270346, 027034Z, 0270356,<br>027035Z, 0270366, 027036Z,<br>0270376, 027037Z, 0271346,<br>027134Z, 0271356, 027135Z,<br>0271366, 027136Z, 0271376,<br>027137Z, 0272346, 027234Z,<br>0272356, 027235Z, 0272366,<br>027236Z, 0272376, 027237Z,<br>0273346, 027334Z, 0273356,<br>027335Z, 0273366, 027336Z,<br>0273376, 027337Z, 0270446,<br>027044Z, 0270456, 027045Z,<br>0270466, 027046Z, 0270476,<br>027047Z, 0271446, 027144Z,<br>0271456, 027145Z, 0271466,<br>027146Z, 0271476, 027147Z,<br>0272446, 027244Z, 0272456,<br>027245Z, 0272466, 027246Z,<br>0272476, 027247Z, 0273446,<br>027344Z, 0273456, 027345Z,<br>0273466, 027346Z, 0273476,<br>027347Z |
| Bare metal stent                               | 3606                                                                                                                                    | 02703D6, 02703DZ, 02703E6,                                                                                                                                                                                                                                                                                                                                                                                                                                                                                                                                                                                                                                    |

|                                            |                                        |                                                                                                                                                                                                                                                                                                                                                                                                                                                                                                                                                                                                                                |
|--------------------------------------------|----------------------------------------|--------------------------------------------------------------------------------------------------------------------------------------------------------------------------------------------------------------------------------------------------------------------------------------------------------------------------------------------------------------------------------------------------------------------------------------------------------------------------------------------------------------------------------------------------------------------------------------------------------------------------------|
|                                            |                                        | 02703EZ, 02703F6, 02703FZ,<br>02703G6, 02703GZ, 02713D6,<br>02713DZ, 02713E6, 02713EZ,<br>02713F6, 02713FZ, 02713G6,<br>02713GZ, 02723D6, 02723DZ,<br>02723E6, 02723EZ, 02723F6, 02723FZ,<br>02723G6, 02723GZ, 02733D6,<br>02733DZ, 02733E6, 02733EZ,<br>02733F6, 02733FZ, 02733G6,<br>02733GZ, 02704D6, 02704DZ,<br>02704E6, 02704EZ, 02704F6, 02704FZ,<br>02704G6, 02704GZ, 02714D6,<br>02714DZ, 02714E6', 02714EZ,<br>02714F6, 02714FZ, 02714G6,<br>02714GZ, 02724D6, 02724DZ,<br>02724E6, 02724EZ, 02724F6',<br>02724FZ, 02724G6, 02724GZ,<br>02734D6, 02734DZ, 02734E6,<br>02734EZ, 02734F6, 02734FZ,<br>02734G6, 02734GZ |
| Plain old balloon<br>angioplasty           | 0066                                   | 02703Z6, 02703ZZ, 02713Z6, 02713ZZ,<br>02723Z6, 02723ZZ, 02733Z6, 02733ZZ,<br>02704Z6, 02704ZZ, 02714Z6, 02714ZZ,<br>02724Z6, 02724ZZ, 02734Z6, 02734ZZ                                                                                                                                                                                                                                                                                                                                                                                                                                                                        |
| Coronary<br>angiography                    | 8850, 8853, 8854, 8855,<br>8856, 8857, | B2110ZZ, B211010, B211110,<br>B2111ZZ, B211Y10, B211YZZ,<br>B210010, B2100ZZ, B210110,<br>B2101ZZ, B210Y10, B210YZZ                                                                                                                                                                                                                                                                                                                                                                                                                                                                                                            |
| Nuclear<br>Myocardial<br>perfusion imaging | 9205                                   | C2161ZZ, C216YZZ, C21G1ZZ,<br>C21GDZZ, C21GSZZ, C21GYZZ,<br>C21GZZZ, C21YZZZ                                                                                                                                                                                                                                                                                                                                                                                                                                                                                                                                                   |
| Intravascular<br>ultrasound                | 0024                                   | B241YZZ, B241ZZ3, B241ZZZ, B240YZZ,<br>B240ZZ3, B240ZZZ                                                                                                                                                                                                                                                                                                                                                                                                                                                                                                                                                                        |
| Intervention on one<br>coronary vessel     | 0040                                   | 0270346, 027034Z, 02703D6,<br>02703DZ, 0270446, 027044Z,<br>02704D6, 02704DZ, 0270356,<br>027035Z, 02703E6, 02703EZ,<br>0270456, 027045Z, 02704E6,<br>02704EZ, 0270366, 027036Z,<br>02703F6, 02703FZ, 0270466,<br>027046Z, 02704F6, 02704FZ,<br>0270376, 027037Z, 02703G6,<br>02703GZ, 0270476, 027047Z,                                                                                                                                                                                                                                                                                                                       |

|                                               |      |                                                                                                                                                                                                                                                                                                |
|-----------------------------------------------|------|------------------------------------------------------------------------------------------------------------------------------------------------------------------------------------------------------------------------------------------------------------------------------------------------|
|                                               |      | 02704G6, 02704GZ                                                                                                                                                                                                                                                                               |
| Intervention on two coronary vessels          | 0041 | 0271346, 027134Z, 02713D6, 02713DZ, 0271446, 027144Z, 02714D6, 02714DZ, 0271356, 027135Z, 02713E6, 02713EZ, 0271456, 027145Z, 02714E6, 02714EZ, 0271366, 027136Z, 02713F6, 02713FZ, 0271466, 027146Z, 02714F6, 02714FZ, 0271376, 027137Z, 02713G6, 02713GZ, 0271476, 027147Z, 02714G6, 02714GZ |
| Intervention on three coronary vessels        | 0042 | 0272346, 027234Z, 02723D6, 02723DZ, 0272446, 027244Z, 02724D6, 02724DZ, 0272356, 027235Z, 02723E6, 02723EZ, 0272456, 027245Z, 02724E6, 02724EZ, 0272366, 027236Z, 02723F6, 02723FZ, 0272466, 027246Z, 02724F6, 02724FZ, 0272376, 027237Z, 02723G6, 02723GZ, 0272476, 027247Z, 02724G6, 02724GZ |
| Intervention on four or more coronary vessels | 0043 | 0273346, 027334Z, 02733D6, 02733DZ, 0273446, 027344Z, 02734D6, 02734DZ, 0273356, 027335Z, 02733E6, 02733EZ, 0273456, 027345Z, 02734E6, 02734EZ, 0273366, 027336Z, 02733F6, 02733FZ, 0273466, 027346Z, 02734F6, 02734FZ, 0273376, 027337Z, 02733G6, 02733GZ, 0273476, 027347Z, 02734G6, 02734GZ |
| One stent placed                              | 0045 | 0270346, 027034Z, 02703D6, 02703DZ, 0270446, 027044Z, 02704D6, 02704DZ, 0271346, 027134Z, 02713D6, 02713DZ, 0271446, 027144Z, 02714D6, 02714DZ, 0272346, 027234Z, 02723D6, 02723DZ, 0272446, 027244Z, 02724D6, 02724DZ, 0273346, 027334Z, 02733D6, 02733DZ, 0273446, 027344Z,                  |

|                            |      |                                                                                                                                                                                                                                                                                                                              |
|----------------------------|------|------------------------------------------------------------------------------------------------------------------------------------------------------------------------------------------------------------------------------------------------------------------------------------------------------------------------------|
|                            |      | 02734D6, 02734DZ                                                                                                                                                                                                                                                                                                             |
| Two stents placed          | 0046 | 0270356, 027035Z, 02703E6,<br>02703EZ, 0270456, 027045Z,<br>02704E6, 02704EZ, 0271356,<br>027135Z, 02713E6, 02713EZ,<br>0271456, 027145Z, 02714E6,<br>02714EZ, 0272356, 027235Z,<br>02723E6, 02723EZ, 0272456,<br>027245Z, 02724E6, 02724EZ,<br>0273356, 027335Z, 02733E6,<br>02733EZ, 0273456, 027345Z,<br>02734E6, 02734EZ |
| Three stents placed        | 0047 | 0270366, 027036Z, 02703F6,<br>02703FZ, 0270466, 027046Z,<br>02704F6, 02704FZ, 0271366,<br>027136Z, 02713F6, 02713FZ,<br>0271466, 027146Z, 02714F6,<br>02714FZ, 0272366, 027236Z,<br>02723F6, 02723FZ, 0272466,<br>027246Z, 02724F6, 02724FZ,<br>0273366, 027336Z, 02733F6,<br>02733FZ, 0273466, 027346Z,<br>02734F6, 02734FZ |
| Four or more stents placed | 0048 | 0270376, 027037Z, 02703G6,<br>02703GZ, 0270476, 027047Z,<br>02704G6, 02704GZ, 0271376,<br>027137Z, 02713G6, 02713GZ,<br>0271476, 027147Z, 02714G6,<br>02714GZ, 0272376, 027237Z,<br>02723G6, 02723GZ, 0272476,<br>027247Z, 02724G6, 02724GZ,<br>0273376, 027337Z, 02733G6,<br>02733GZ, 0273476, 027347Z,<br>02734G6, 02734GZ |

**Supplemental Table 2):** rates per 100 person-years for long-term outcomes by type of ACS presentation

| Outcome                                       | Unstable angina            | NSTEMI | STEMI | P value |
|-----------------------------------------------|----------------------------|--------|-------|---------|
|                                               | Rates per 100 person-years |        |       |         |
| Long-term recurrent ACS                       | 12.3                       | 27.2   | 54.6  | <0.001  |
| Long-term need for coronary revascularization | 12.4                       | 12.6   | 10.7  | 0.2     |
| Long-term mortality                           | 24.3                       | 45.8   | 58.7  | <0.0001 |
| Long-term HF                                  | 12.5                       | 15.1   | 13.7  | 0.2     |
| Long-term bleeding                            | 7.6                        | 9.6    | 8.3   | 0.7     |

**Supplemental Table 3):** Balance between invasive and conservative approach groups in NSTEMI-ACS after propensity score matching.

| Variable                                       | Conservative | Invasive     | Standardized difference* |
|------------------------------------------------|--------------|--------------|--------------------------|
| N                                              | 1750         | 1750         |                          |
| Age                                            | 78.34 (8.47) | 78.33 (9.18) | 0.00                     |
| Male Sex                                       | 0.61 (0.49)  | 0.62 (0.49)  | -0.01                    |
| Race                                           | 1.13 (0.44)  | 1.14 (0.44)  | -0.01                    |
| Diabetes                                       | 0.56 (0.50)  | 0.56 (0.50)  | -0.00                    |
| Hypertension                                   | 0.95 (0.21)  | 0.95 (0.22)  | 0.02                     |
| Congestive heart failure                       | 0.82 (0.38)  | 0.83 (0.38)  | -0.01                    |
| Chronic pulmonary disease                      | 0.43 (0.50)  | 0.44 (0.50)  | -0.01                    |
| Prior ischemic stroke                          | 0.24 (0.43)  | 0.24 (0.43)  | 0.00                     |
| Peripheral vascular disease                    | 0.48 (0.50)  | 0.48 (0.50)  | 0.00                     |
| Hypothyroidism                                 | 0.26 (0.44)  | 0.25 (0.43)  | 0.02                     |
| Liver disease                                  | 0.03 (0.18)  | 0.03 (0.18)  | 0.01                     |
| Alcohol abuse                                  | 0.02 (0.12)  | 0.01 (0.11)  | 0.02                     |
| Deficiency Anemias                             | 0.47 (0.50)  | 0.46 (0.50)  | 0.02                     |
| Chronic kidney disease                         | 0.31 (0.46)  | 0.31 (0.46)  | -0.00                    |
| Prior bleeding                                 | 0.41 (0.49)  | 0.40 (0.49)  | 0.03                     |
| Prior cerebral hemorrhage                      | 0.01 (0.09)  | 0.01 (0.08)  | 0.03                     |
| Prior coronary artery disease                  | 0.93 (0.25)  | 0.92 (0.26)  | 0.02                     |
| Admission with ACS within 6 months before TAVR | 0.23 (0.42)  | 0.23 (0.42)  | 0.00                     |
| Smoker                                         | 0.41 (0.49)  | 0.42 (0.49)  | -0.01                    |
| Prior revascularization                        | 0.65 (0.48)  | 0.64 (0.48)  | 0.02                     |
| End-stage renal disease on dialysis            | 0.09 (0.29)  | 0.09 (0.28)  | 0.01                     |
| Pulmonary hypertension                         | 0.22 (0.42)  | 0.22 (0.41)  | 0.01                     |
| Preexisting atrial fibrillation                | 0.36 (0.48)  | 0.36 (0.48)  | 0.01                     |
| Prior permanent pacemaker                      | 0.12 (0.33)  | 0.12 (0.32)  | 0.02                     |
| Prior intracardiac defibrillator               | 0.06 (0.23)  | 0.05 (0.23)  | 0.01                     |
| Rheumatoid arthritis/connective tissue disease | 0.07 (0.25)  | 0.06 (0.24)  | 0.01                     |
| Underweight                                    | 0.01 (0.09)  | 0.01 (0.09)  | 0.01                     |
| Obese                                          | 0.27 (0.44)  | 0.26 (0.44)  | 0.01                     |
| History of Coagulopathy                        | 0.22 (0.42)  | 0.22 (0.41)  | 0.01                     |
| Depression                                     | 0.17 (0.38)  | 0.16 (0.37)  | 0.02                     |
| Drug abuse                                     | 0.01 (0.09)  | 0.01 (0.10)  | -0.02                    |
| Lymphoma                                       | 0.02 (0.13)  | 0.02 (0.13)  | -0.01                    |
| Fluid and electrolyte disorders                | 0.48 (0.50)  | 0.47 (0.50)  | 0.02                     |
| Metastatic cancer                              | 0.01 (0.08)  | 0.01 (0.07)  | 0.02                     |



|                                |             |             |       |
|--------------------------------|-------------|-------------|-------|
| Solid tumor without metastasis | 0.05 (0.21) | 0.05 (0.22) | -0.01 |
| Obesity                        | 0.31 (0.46) | 0.30 (0.46) | 0.02  |
| History of paralysis           | 0.04 (0.21) | 0.04 (0.21) | 0.00  |
| Psychoses                      | 0.03 (0.16) | 0.03 (0.17) | -0.02 |
| Weight loss                    | 0.07 (0.26) | 0.07 (0.25) | 0.02  |
| Apical access for TAVR         | 0.14 (0.34) | 0.14 (0.35) | -0.01 |
| Valve-in-TAVR                  | 0.01 (0.11) | 0.01 (0.11) | -0.01 |

\* Standardized difference <0.1 is considered to be well balanced

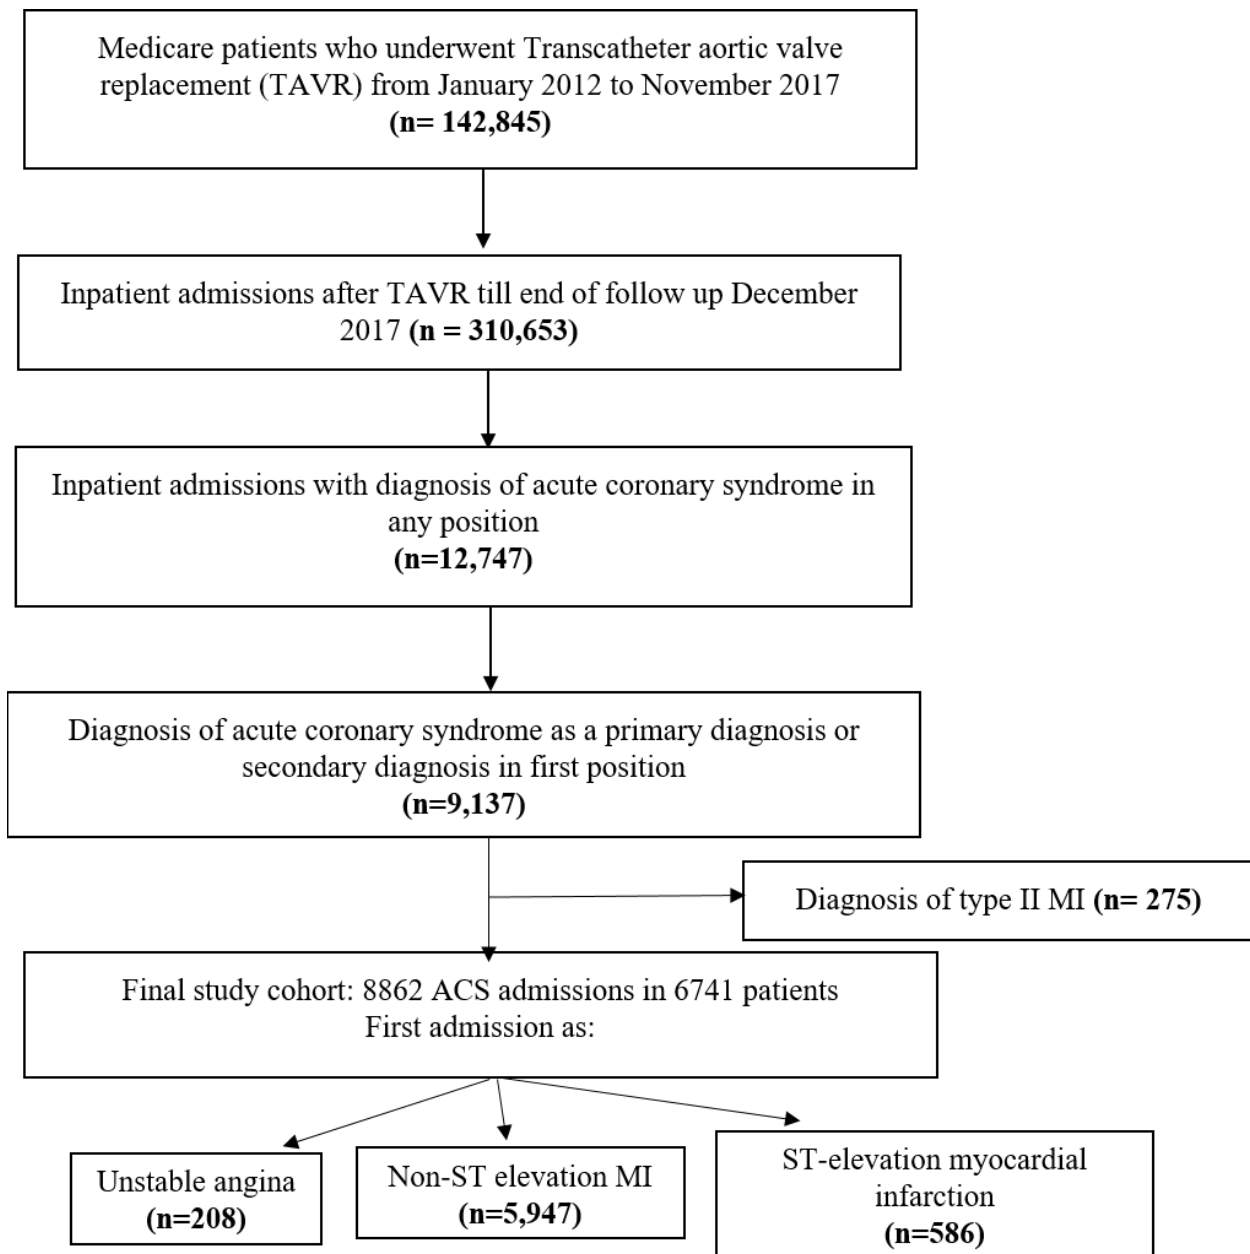

**Supplemental Figure 1:** Flow chart of the study population.

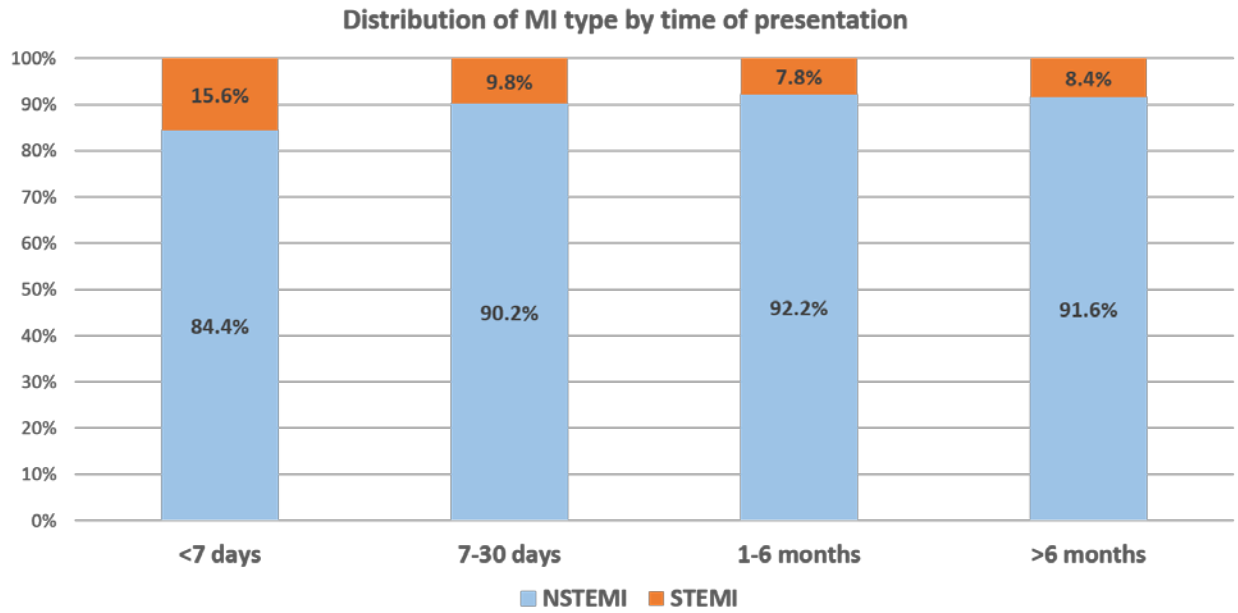

**Supplemental Figure 2:** Distribution of types of myocardial infarction by timing of presentation

**Unadjusted survival in patients with non-ST elevation ACS after TAVR with invasive versus conservative treatment**

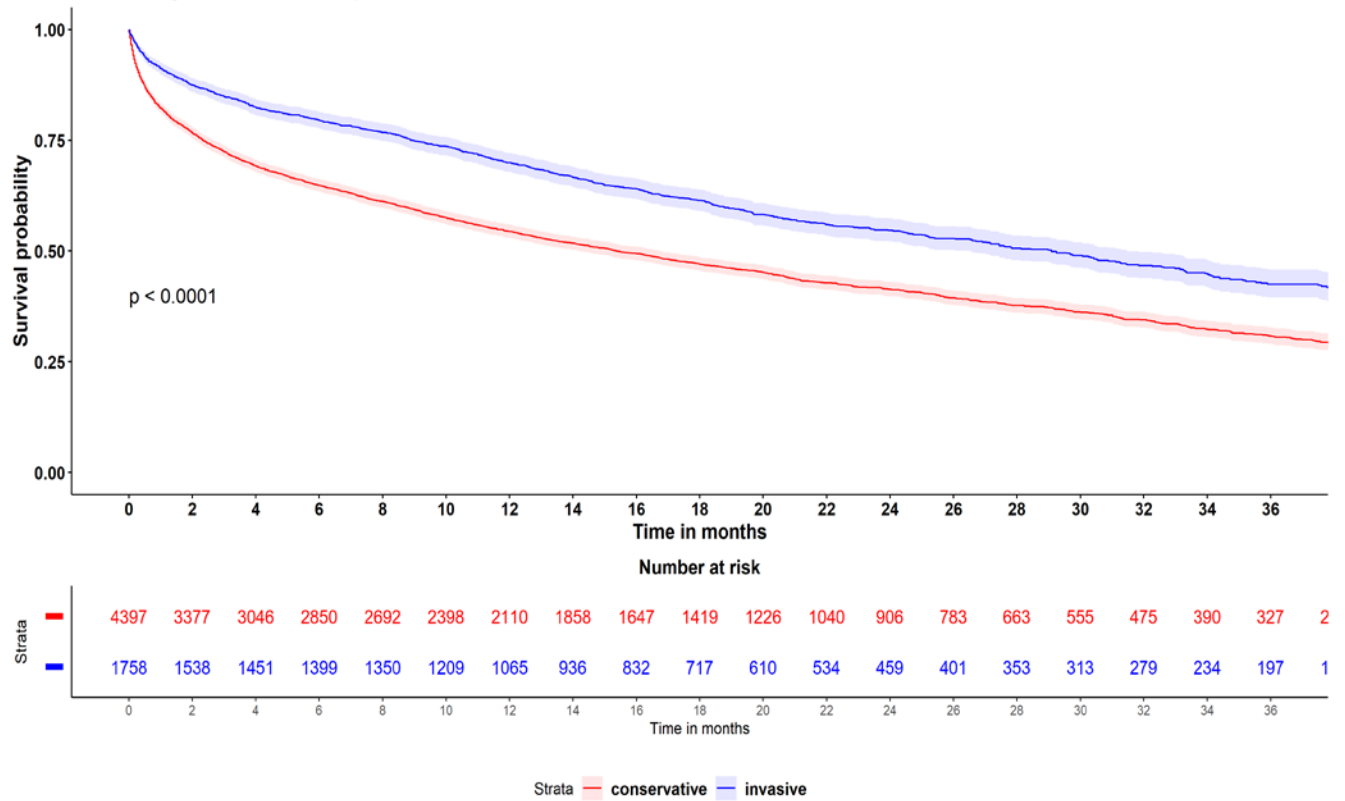

**Supplemental Figure 3A:** Unadjusted Kaplan Meier curves of survival with invasive versus conservative approach in patients presenting with non-ST elevation acute coronary syndrome after TAVR

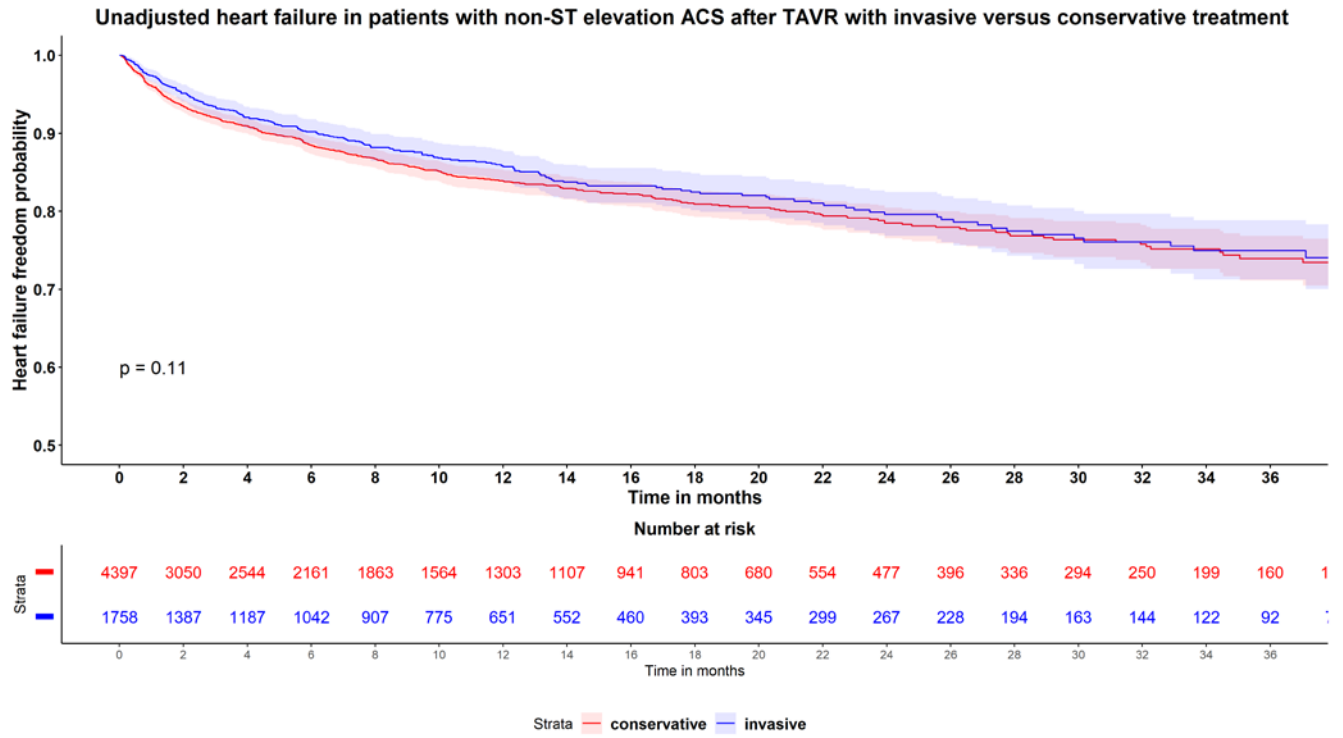

**Supplemental Figure 3B:** Unadjusted Kaplan Meier curves of heart failure with invasive versus conservative approach in patients presenting with non-ST elevation acute coronary syndrome after TAVR

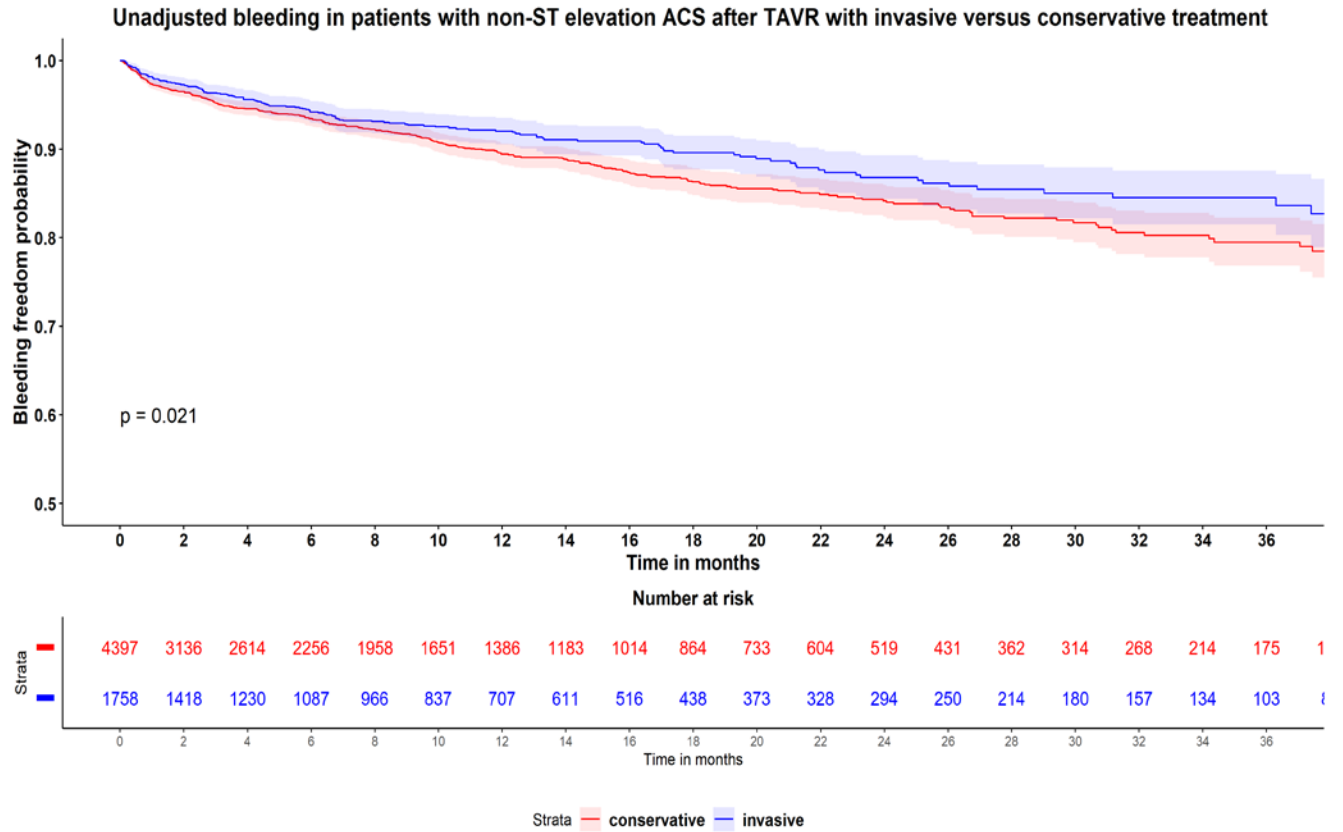

**Supplemental Figure 3C:** Unadjusted Kaplan Meier curves of bleeding with invasive versus conservative approach in patients presenting with non-ST elevation acute coronary syndrome after TAVR

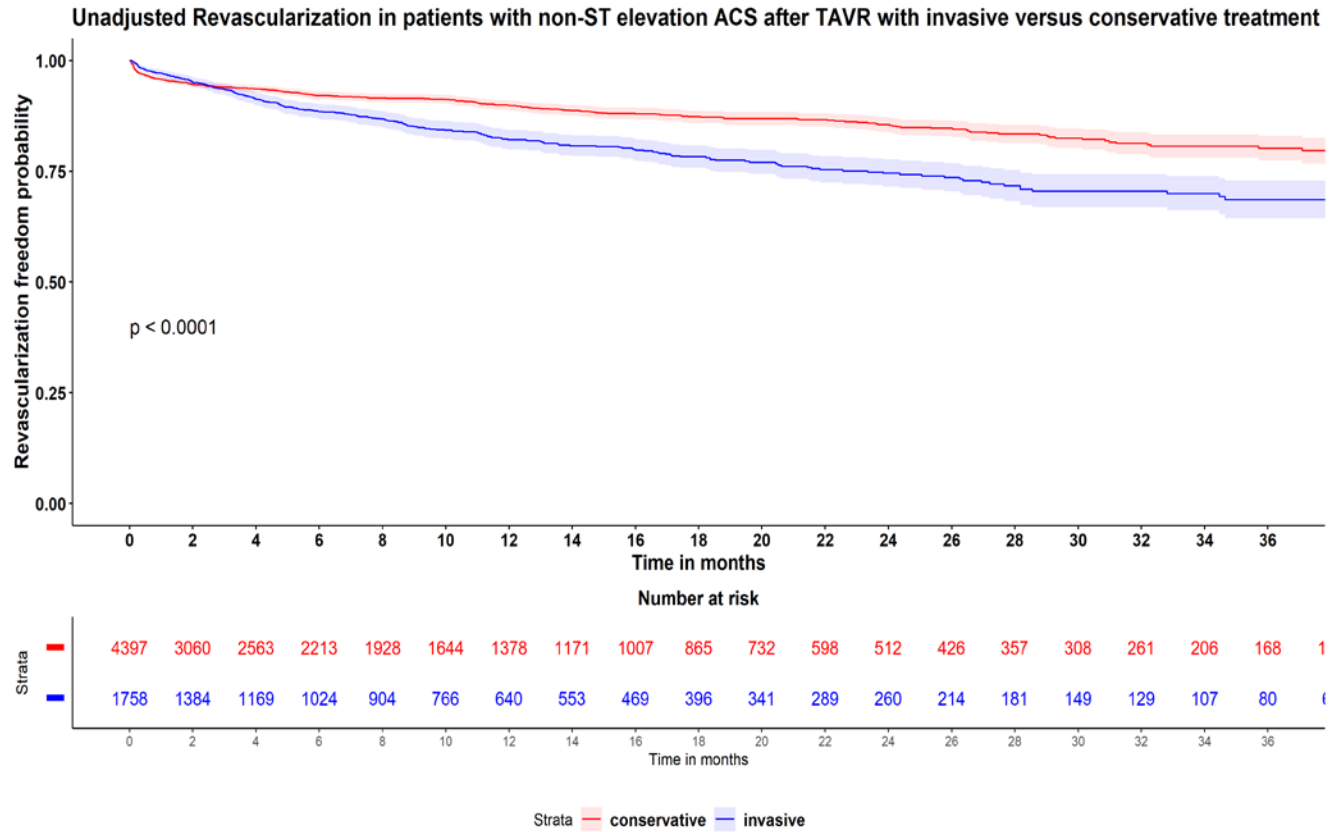

**Supplemental Figure 3D:** Unadjusted Kaplan Meier curves of need for revascularization with invasive versus conservative approach in patients presenting with non-ST elevation acute coronary syndrome after TAVR

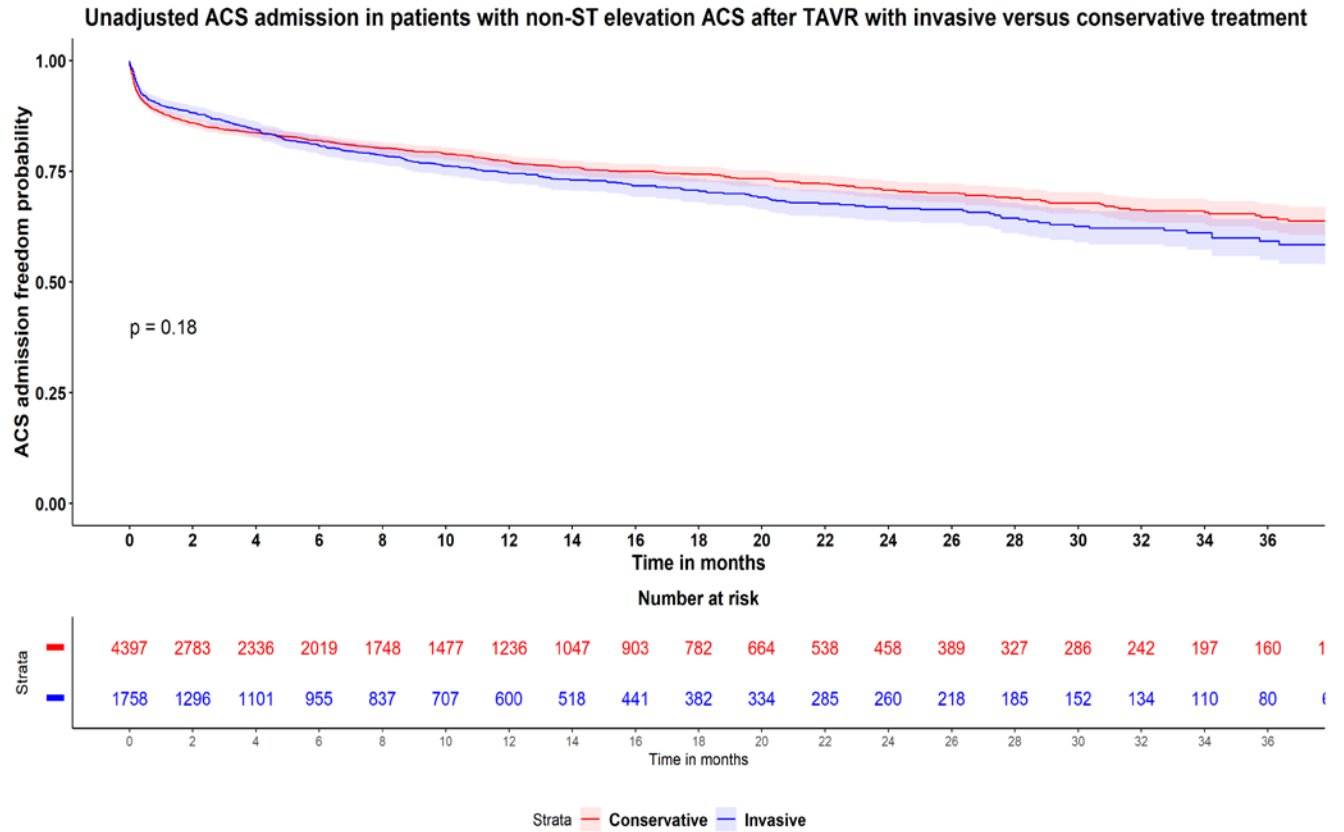

**Supplemental Figure 3E:** Unadjusted Kaplan Meier curves of ACS readmission with invasive versus conservative approach in patients presenting with non-ST elevation acute coronary syndrome after TAVR
